# Supplementary material for: Orphan nuclear receptor NR4A2 induces transcription of the immunomodulatory peptide hormone prolactin
Source: Springer Nature journal article supplement (doi:10.1186/s12950-015-0059-2), 2015-02-17
Supplement: MOESM1 [file 9763626]

Supplemental Table 1. Gene expression data from K4IM cells transduced with NR4A2

| Array Position | Gene Name               | Control, Ct  | NR4A2, Ct    | Fold change |
|----------------|-------------------------|--------------|--------------|-------------|
| A1             | 18S-Hs9999901_s1        | 20.99        | 20.98        | reference   |
| A2             | GAPDH-Hs9999905_m1      | 19.97        | 18.97        | reference   |
| A3             | HPRT1-Hs9999909_m1      | 24.96        | 23.94        | reference   |
| A4             | GUSB-Hs9999908_m1       | 25.94        | 24.94        | reference   |
| A5             | FGA-Hs00241027_m1       | Undetermined | 37.07        |             |
| A6             | PLG-Hs00264877_m1       | Undetermined | Undetermined |             |
| A7             | SERPINC1-Hs00166654_m1  | 35.97        | 35.95        | 0.507257    |
| A8             | PRL-Hs00168730_m1       | 37.02        | 29.94        | 68.123572   |
| A9             | MMP2-Hs00234422_m1      | 27.97        | 29.98        | 0.125495    |
| A10            | ANG;RNASE4-Hs02379000_s | 33.95        | 32.95        | 1.003410    |
| A11            | ANGPT1-Hs00181613_m1    | 30.97        | 27.99        | 3.974345    |
| A12            | ANGPT2-Hs00169867_m1    | 37.09        | Undetermined |             |
| B1             | CXCL12-Hs00171022_m1    | 37.05        | 37.03        | 0.508124    |
| B2             | EDIL3-Hs00174781_m1     | 29.97        | 28.96        | 1.006749    |
| B3             | EPHB2-Hs00362096_m1     | 30.97        | 32.97        | 0.125237    |
| B4             | FGF1-Hs00265254_m1      | 28.95        | 30.96        | 0.124342    |
| B5             | FGF2-Hs00266645_m1      | 26.97        | 26.97        | 0.502696    |
| B6             | FGF4-Hs00173564_m1      | Undetermined | Undetermined |             |
| B7             | FST-Hs00246256_m1       | 30.97        | 26.98        | 8.012268    |
| B8             | HGF-Hs00300159_m1       | 37.08        | 36.96        | 0.543901    |
| B9             | IL8-Hs00174103_m1       | 34.94        | 31.95        | 4.001174    |
| B10            | LEP-Hs00174877_m1       | Undetermined | Undetermined |             |
| B11            | MDK-Hs00171064_m1       | 25.97        | 25.98        | 0.497683    |
| B12            | TYMP-Hs00157317_m1      | Undetermined | Undetermined |             |
| C1             | PDGFB-Hs00234042_m1     | 30.98        | 33.98        | 0.062839    |
| C2             | PTN-Hs00383235_m1       | 31.96        | 31.95        | 0.506322    |
| C3             | PROK1-Hs00260905_m1     | 37.05        | 37.04        | 0.505828    |
| C4             | TGFA-Hs00608187_m1      | 37.15        | 37.01        | 0.552665    |
| C5             | TGFB1-Hs9999918_m1      | 25.97        | 25.97        | 0.501807    |
| C6             | TNF-Hs00174128_m1       | 37.03        | Undetermined |             |
| C7             | VEGFA-Hs00900054_m1     | 30.98        | 29.97        | 1.010933    |
| C8             | VEGFB-Hs00173634_m1     | 25.95        | 25.96        | 0.497744    |
| C9             | VEGFC-Hs00153458_m1     | 30.96        | 29.97        | 1.003016    |
| C10            | CTGF-Hs00170014_m1      | 24.94        | 24.93        | 0.507293    |
| C11            | FBLN5-Hs00197064_m1     | 34.99        | 28.98        | 32.273701   |
| C12            | THBS1-Hs00962914_m1     | 24.94        | 20.94        | 8.073195    |
| D1             | TNFSF15-Hs00270802_s1   | 36.97        | 37.01        | 0.487463    |
| D2             | ITGA4-Hs00168433_m1     | 30.96        | 29.95        | 1.017138    |
| D3             | IFNB1-Hs01077958_s1     | 36.97        | 36.98        | 0.497366    |
| D4             | IFNG-Hs00174143_m1      | Undetermined | Undetermined |             |
| D5             | CXCL10-Hs00171042_m1    | 37.08        | 37.05        | 0.511025    |
| D6             | IL12A-Hs00168405_m1     | 33.96        | 34.97        | 0.250256    |
| D7             | SERPINF1-Hs00171467_m1  | 37.03        | 36.00        | 1.021844    |
| D8             | PF4-Hs00427220_g1       | Undetermined | Undetermined |             |
| D9             | VASH1-Hs00208609_m1     | 33.98        | 32.98        | 1.001817    |
| D10            | ADAMTS1-Hs00199608_m1   | 28.97        | 29.96        | 0.254286    |
| D11            | ANGPTL1-Hs00559786_m1   | 36.98        | 37.14        | 0.449213    |
| D12            | AMOT-Hs00611096_m1      | 34.96        | 34.97        | 0.500919    |
| E1             | CD44-Hs00153304_m1      | 25.97        | 25.95        | 0.507280    |
| E2             | CDH5-Hs00174344_m1      | 35.97        | 32.97        | 4.020906    |
| E3             | CXCL2-Hs00601975_m1     | 32.97        | 32.97        | 0.504075    |
| E4             | SERPINB5-Hs00184728_m1  | 36.98        | 37.03        | 0.486185    |
| E5             | FLT1-Hs00176573_m1      | Undetermined | 37.06        |             |
| E6             | SEMA3F-Hs00188273_m1    | 35.97        | 37.03        | 0.240404    |
| E7             | TEK-Hs00176096_m1       | 35.94        | 31.95        | 8.016538    |
| E8             | TIE1-Hs00178500_m1      | Undetermined | Undetermined |             |
| E9             | TNMD-Hs00223332_m1      | Undetermined | Undetermined |             |
| E10            | TIMP2-Hs00234278_m1     | 25.98        | 25.97        | 0.502656    |
| E11            | TIMP3-Hs00165949_m1     | 35.95        | 35.96        | 0.499131    |
| E12            | ANGPTL2-Hs00765775_m1   | 29.96        | 29.95        | 0.503725    |
| F1             | ANGPTL3-Hs00205581_m1   | 37.05        | Undetermined |             |
| F2             | CEACAM1-Hs00236077_m1   | 36.96        | 37.09        | 0.458249    |
| F3             | HEY1-Hs00232618_m1      | 35.99        | 35.98        | 0.505067    |
| F4             | ITGAV-Hs00233808_m1     | 27.95        | 26.97        | 0.989899    |
| F5             | PECAM1-Hs00169777_m1    | 37.24        | 37.10        | 0.553242    |
| F6             | LYVE1-Hs00272659_m1     | Undetermined | Undetermined |             |
| F7             | KIT-Hs00174029_m1       | Undetermined | Undetermined |             |
| F8             | TNNI1-Hs00913333_m1     | 35.94        | 36.98        | 0.244309    |
| F9             | NRP2-Hs00187290_m1      | 28.95        | 27.95        | 1.010869    |
| F10            | KDR-Hs00176676_m1       | Undetermined | Undetermined |             |
| F11            | ENPP2-Hs00196470_m1     | 30.97        | 29.96        | 1.009897    |
| F12            | FIGF-Hs00189521_m1      | 35.95        | 33.95        | 2.010070    |
| G1             | FOXC2-Hs00270951_s1     | 29.98        | 29.97        | 0.506095    |
| G2             | COL4A1-Hs00266237_m1    | 33.99        | 33.99        | 0.502362    |
| G3             | COL4A2-Hs01098873_m1    | 25.95        | 25.96        | 0.499355    |
| G4             | COL15A1-Hs00266332_m1   | Undetermined | Undetermined |             |
| G5             | HSPG2-Hs00194179_m1     | 32.98        | 33.98        | 0.249770    |
| G6             | COL18A1-Hs00181017_m1   | 36.97        | Undetermined |             |
| G7             | FN1-Hs01549940_m1       | 27.96        | 25.95        | 2.027555    |
| G8             | COL4A3-Hs01022527_m1    | Undetermined | Undetermined |             |
| G9             | F2-Hs01011995_g1        | 34.97        | 34.95        | 0.507449    |
| G10            | BAI1-Hs01105174_m1      | Undetermined | Undetermined |             |
| G11            | CHGA-Hs00900373_m1      | 37.02        | Undetermined |             |
| G12            | ANGPT4-Hs00211115_m1    | Undetermined | Undetermined |             |
| H1             | CSF3-Hs99999083_m1      | Undetermined | Undetermined |             |
| H2             | GRN-Hs00963711_g1       | 23.97        | 23.98        | 0.499637    |
| H3             | THBS2-Hs01568063_m1     | 28.99        | 28.96        | 0.512394    |
| H4             | LECT1-Hs00993254_m1     | Undetermined | Undetermined |             |
| H5             | ANGPTL4-Hs01101127_m1   | 33.97        | 33.97        | 0.504320    |
| H6             | ITGB3-Hs01001469_m1     | 34.96        | 31.98        | 3.978366    |
| H7             | PDGFRA-Hs00998026_m1    | 35.96        | 35.96        | 0.502685    |
| H8             | PDGFRB-Hs00387364_m1    | 30.96        | 33.96        | 0.062885    |
| H9             | FLT4-Hs01047677_m1      | 34.98        | 33.98        | 1.009024    |
| H10            | NRP1-Hs00826128_m1      | 27.96        | 26.95        | 1.005750    |
| H11            | S1PR1-Hs01922614_s1     | 27.94        | 26.94        | 1.004412    |
| H12            | PROX1-Hs00896294_m1     | 37.02        | 35.96        | 1.049121    |
