# Supplementary material for: Orphan nuclear receptor NR4A2 induces transcription of the immunomodulatory peptide hormone prolactin
Source: Springer Nature journal article supplement (doi:10.1186/s12950-015-0059-2), 2015-02-17
Supplement: MOESM2 [file 9763626]

## Supplemental Figure 1. Effects of rhPRL on synoviocyte proliferation

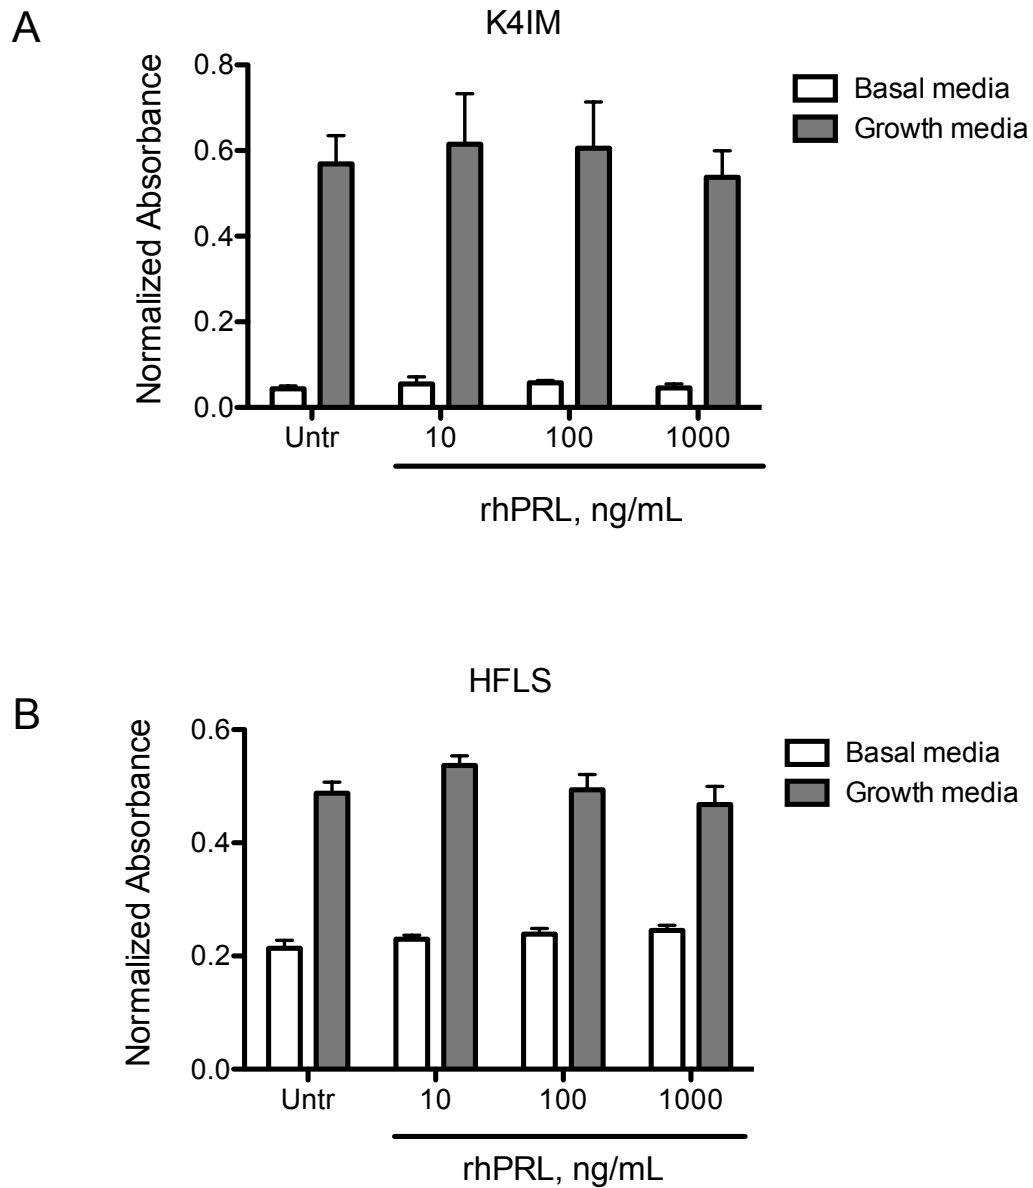

K4IM synoviocytes (A) and RA-HFLS (B) were cultured in serum-free basal media or growth media containing 10% FBS alone or with rhPRL (10-1000ng/mL) for 96 hours. Cell growth and viability was measured using the Promega CellTiter 96 cell proliferation assay and absorbance at 570nm was recorded.
