# Supplementary material for: Orphan nuclear receptor NR4A2 induces transcription of the immunomodulatory peptide hormone prolactin
Source: Springer Nature journal article supplement (doi:10.1186/s12950-015-0059-2), 2015-02-17
Supplement: MOESM3 [file 9763626]

Supplemental Figure 2. Gene expression data from K41M cells treated with rhPRL

| Position | Symbol | Untreated, Ct | rhPRL, Ct | Fold Regulation |
|----------|--------|---------------|-----------|-----------------|
| A01      | A2M    | 35            | 35        | -1.1456         |
| A02      | AKT1   | 26.04         | 24.77     | 2.094           |
| A03      | BCL2L1 | 27.25         | 26.04     | 2.0145          |
| A04      | CCND1  | 26.56         | 25.76     | 1.5247          |
| A05      | CDKN1A | 24.75         | 35        | -1394.7208      |
| A06      | CEBPB  | 30.57         | 29.73     | 1.5587          |
| A07      | CEBPD  | 30.19         | 28.99     | 2.0131          |
| A08      | CRK    | 27.53         | 26.94     | 1.3104          |
| A09      | CRP    | 35            | 35        | -1.1456         |
| A10      | CSF1R  | 35            | 35        | -1.1456         |
| A11      | CXCL9  | 35            | 35        | -1.1456         |
| A12      | EGFR   | 26.43         | 25.53     | 1.6247          |
| B01      | EPOR   | 35            | 30.5      | 19.7081         |
| B02      | F2     | 35            | 34.19     | 1.5334          |
| B03      | F2R    | 33.97         | 33.26     | 1.4295          |
| B04      | FAS    | 27.98         | 27.68     | 1.0749          |
| B05      | FCER2  | 35            | 35        | -1.1456         |
| B06      | FCGR1A | 35            | 35        | -1.1456         |
| B07      | GATA3  | 32.26         | 31.78     | 1.2151          |
| B08      | GHR    | 35            | 35        | -1.1456         |
| B09      | GRB2   | 28.11         | 27.15     | 1.7008          |
| B10      | IFNAR1 | 26.6          | 25.6      | 1.7408          |
| B11      | IFNG   | 35            | 35        | -1.1456         |
| B12      | IFNGR1 | 28.75         | 28.49     | 1.0417          |
| C01      | IL10RA | 35            | 35        | -1.1456         |
| C02      | IL20   | 35            | 35        | -1.1456         |
| C03      | IL2RA  | 35            | 35        | -1.1456         |
| C04      | IL2RG  | 35            | 35        | -1.1456         |
| C05      | IL4    | 35            | 35        | -1.1456         |
| C06      | IL4R   | 35            | 29.33     | 44.5096         |
| C07      | IL6ST  | 25.85         | 24.74     | 1.877           |
| C08      | INSR   | 31.57         | 30.37     | 1.9965          |
| C09      | IRF1   | 28.38         | 26.99     | 2.2855          |
| C10      | IRF9   | 27.4          | 26.16     | 2.0661          |
| C11      | ISG15  | 35            | 26.6      | 295.1941        |
| C12      | JAK1   | 25.84         | 25.29     | 1.2767          |
| D01      | JAK2   | 30            | 29.57     | 1.1788          |
| D02      | JAK3   | 35            | 35        | -1.1456         |
| D03      | JUN    | 28.46         | 27.87     | 1.3081          |
| D04      | JUNB   | 31.16         | 30.33     | 1.5535          |
| D05      | LRG1   | 35            | 35        | -1.1456         |
| D06      | MCL1   | 23.91         | 23.44     | 1.2043          |
| D07      | MPL    | 35            | 35        | -1.1456         |
| D08      | MYC    | 26.71         | 26.08     | 1.3453          |
| D09      | NFKB1  | 29.08         | 28.2      | 1.6107          |
| D10      | NOS2   | 35            | 35        | -1.1456         |
| D11      | NR3C1  | 26.68         | 25.73     | 1.6856          |
| D12      | OAS1   | 30.72         | 29.55     | 1.9608          |
| E01      | OSM    | 35            | 35        | -1.1456         |
| E02      | PDGFRA | 35            | 35        | -1.1456         |
| E03      | PIAS1  | 26.85         | 26.15     | 1.4238          |
| E04      | PIAS2  | 27.92         | 27.35     | 1.2986          |
| E05      | PIAS3  | 26.11         | 26.19     | -1.2127         |
| E06      | PRL    | 35            | 35        | -1.1456         |
| E07      | PRLR   | 34.11         | 34.11     | -1.1382         |
| E08      | PTPN1  | 28.39         | 28.15     | 1.0342          |
| E09      | PTPN11 | 27.24         | 26.52     | 1.4376          |
| E10      | PTPRC  | 35            | 35        | -1.1456         |
| E11      | SH2B1  | 28.37         | 26.99     | 2.27            |
| E12      | SMAD1  | 29.23         | 28.68     | 1.2802          |
| F01      | SMAD2  | 26.56         | 25.8      | 1.4699          |
| F02      | SMAD3  | 32.12         | 31.63     | 1.2206          |
| F03      | SMAD4  | 27.41         | 27        | 1.1539          |
| F04      | SMAD5  | 27.44         | 27        | 1.1819          |
| F05      | SOCS1  | 33.15         | 31.47     | 2.7988          |
| F06      | SOCS2  | 31.91         | 31.06     | 1.5698          |
| F07      | SOCS3  | 31.37         | 31.04     | 1.0928          |
| F08      | SOCS4  | 27.61         | 27.22     | 1.1407          |
| F09      | SOCS5  | 27.25         | 27.01     | 1.0306          |
| F10      | SP1    | 26.89         | 26.19     | 1.4154          |
| F11      | SP1    | 35            | 35        | -1.1456         |
| F12      | SRC    | 29.34         | 28.5      | 1.5625          |
| G01      | STAM   | 27.37         | 27.34     | -1.1186         |
| G02      | STAT1  | 25.61         | 25.04     | 1.295           |
| G03      | STAT2  | 27.29         | 26.16     | 1.9096          |
| G04      | STAT3  | 26.03         | 25.24     | 1.5111          |
| G05      | STAT4  | 32.42         | 31.77     | 1.3662          |
| G06      | STAT5A | 35            | 34.03     | 1.707           |
| G07      | STAT5B | 27.8          | 27.55     | 1.0347          |
| G08      | STAT6  | 27.13         | 26.81     | 1.0846          |
| G09      | STUB1  | 26.25         | 26.3      | -1.1883         |
| G10      | TYK2   | 28.84         | 28.36     | 1.2137          |
| G11      | USF1   | 29.11         | 28.28     | 1.5516          |
| G12      | YY1    | 26.08         | 25.48     | 1.3254          |
| H01      | ACTB   | 20.13         | 19.23     | 1.6223          |
| H02      | B2M    | 21.74         | 21.51     | reference       |
| H03      | GAPDH  | 20.52         | 20.22     | reference       |
| H04      | HPRT1  | 26.11         | 25.22     | 1.6206          |
| H05      | RPLP0  | 20.29         | 20.22     | reference       |
| H06      | HGDC   | 35            | 35        | -1.1456         |
| H07      | RTC    | 25.3          | 26.05     | -1.9306         |
| H08      | RTC    | 25.21         | 25.96     | -1.9254         |
| H09      | RTC    | 25.11         | 26        | -2.1104         |
| H10      | PPC    | 21.63         | 21.23     | 1.1551          |
| H11      | PPC    | 21.59         | 35        | -12451.8481     |
| H12      | PPC    | 22.03         | 35        | -9191.2064      |
